# Supplementary material
Source: PubMed Central journal article supplement (PMC3016939)

## **Supplemental Figure Legends**

**Supplemental Figure 1. Numbers of CD8 T cells and NK cells over time after IL-2 complex treatment.** Three injections of IL-2 complex treatment were given over the course of one week. (A and B) The number of CD8 T cells and NK cells in the spleen was determined by flow cytometry at the indicated time points after the start of treatment. (C) CD44 and CD122 profiles of the CD8 T cell compartment.

**Supplemental Figure 2. Comparison of 3 and 5 injections of IL-2 complex.** (A) Mice were given 3 or 5 injections of IL-2 complex. Numbers of CD44<sup>hi</sup> CD122<sup>hi</sup> CD8 T cells in the spleen were determined on day 7. (B) Phenotype of CD8 T cells in the spleen on day 7. (C and D) Number of CD44<sup>hi</sup> and CD44<sup>lo</sup> K<sup>b</sup>-B8R and K<sup>b</sup>-OVA specific cells in the spleen and lymph node on day 7.

**Supplemental Figure 3. Expansion of CD8 T cells after LM-OVA challenge.** Mice were treated with 3 or 5 injections of IL-2 complex. On day 8, mice were challenged with LM-OVA as shown in Figure 1. Control treated and LM immune mice were also infected. Data show the number of K<sup>b</sup>-OVA specific CD8 T cells in the spleen on the indicated days after infection.

**Supplemental Figure 4. Phenotype of CD8+ T cells treated with 3 or 5 injections of IL-2 complex.** Mice were given 3 or 5 injections of IL-2 complex. (A) Granzyme B staining on CD8+ T cells on day 7 after the start of IL-2 complex treatment. (B) On day 7 after the start of IL-2 complex treatment, CD8+ T cells in the spleen were co-stained for PD-1 and LAG-3. On day 8, mice were challenged with LM-OVA as shown in Figure 1. PD-1 and LAG-3 staining was also performed on CD8+ T cells in the spleen 5 days after LM infection.

**Supplemental Figure 5. Production of IFN $\gamma$  by NK cells after IL-2 complex treatment and innate cytokine stimulation.** Mice were given 3 or 5 injections of IL-2 complex. On day 7, splenocytes were incubated overnight in a cocktail of either IL-2 alone or IL-2, IL-12, and IL-18 as described in Figure 6. The frequency of NK1.1CD3-cells making IFN $\gamma$  is indicated as well as the mean fluorescence intensity (MFI) of the responding population.

Supplemental Figure 1. Hamilton, et.al.

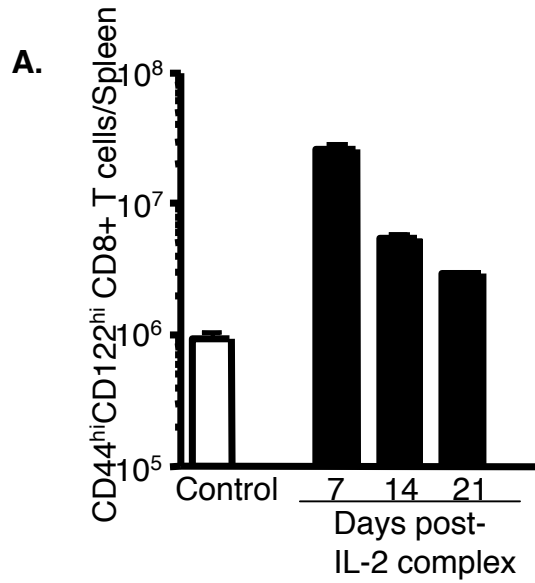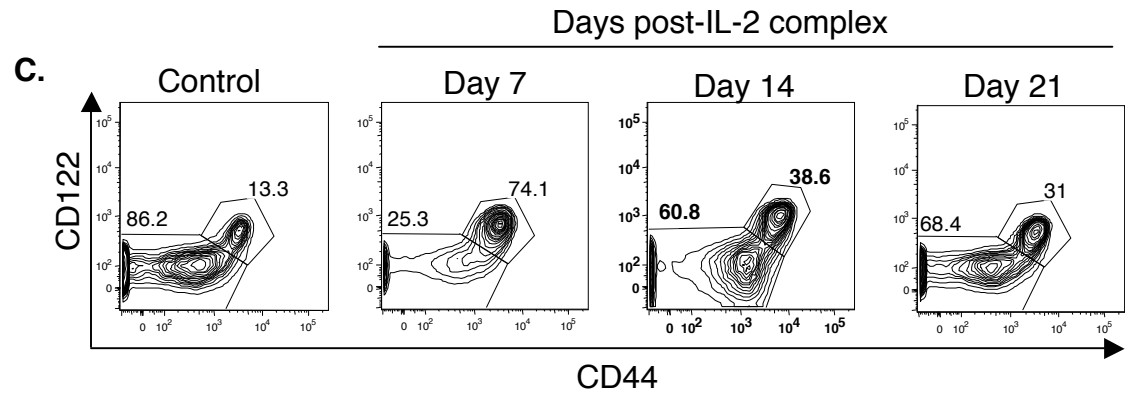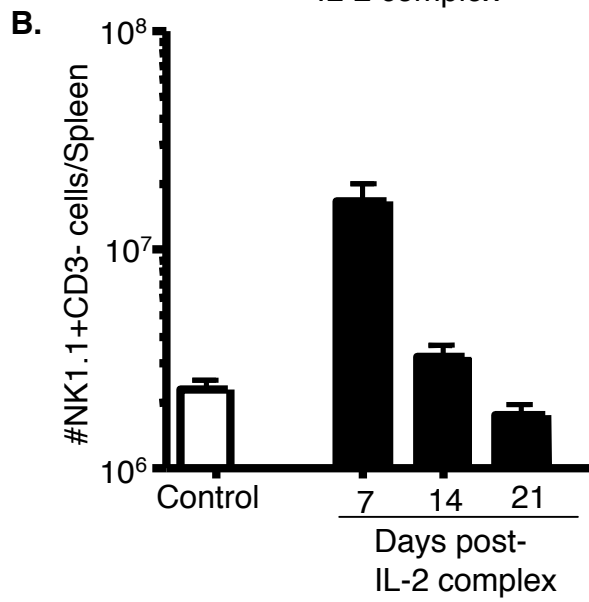

Supplemental Figure 2. Hamilton, et.al.

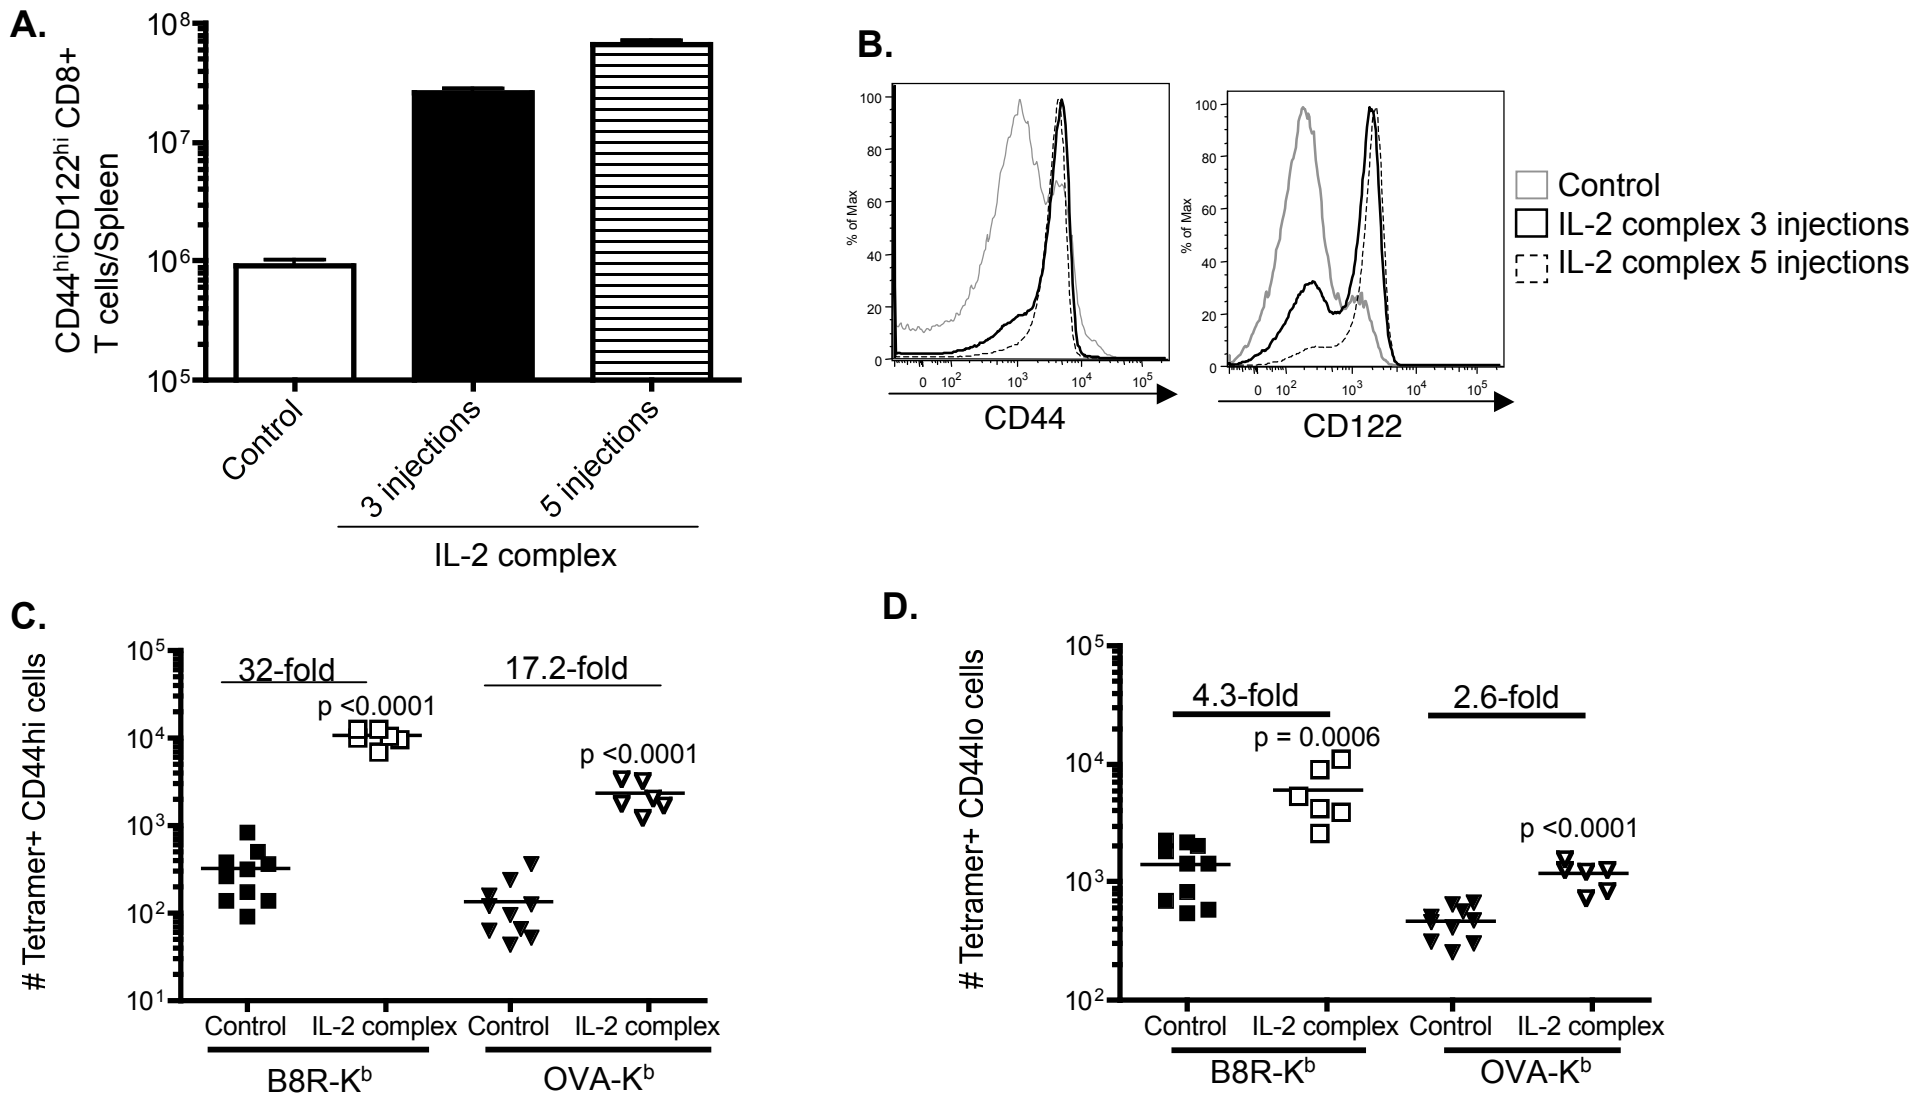

Supplemental Figure 3. Hamilton, et.al.

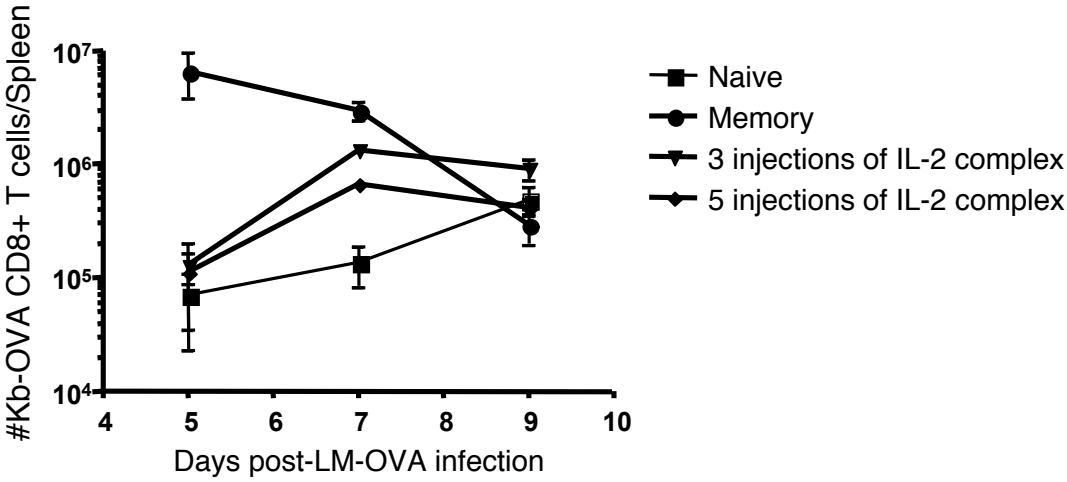

Supplemental Figure 4. Hamilton, et.al.

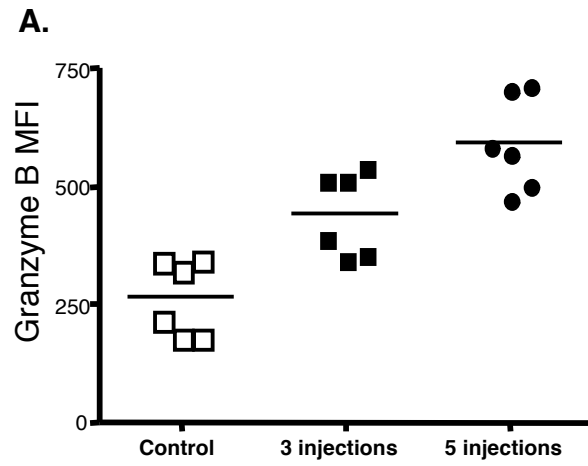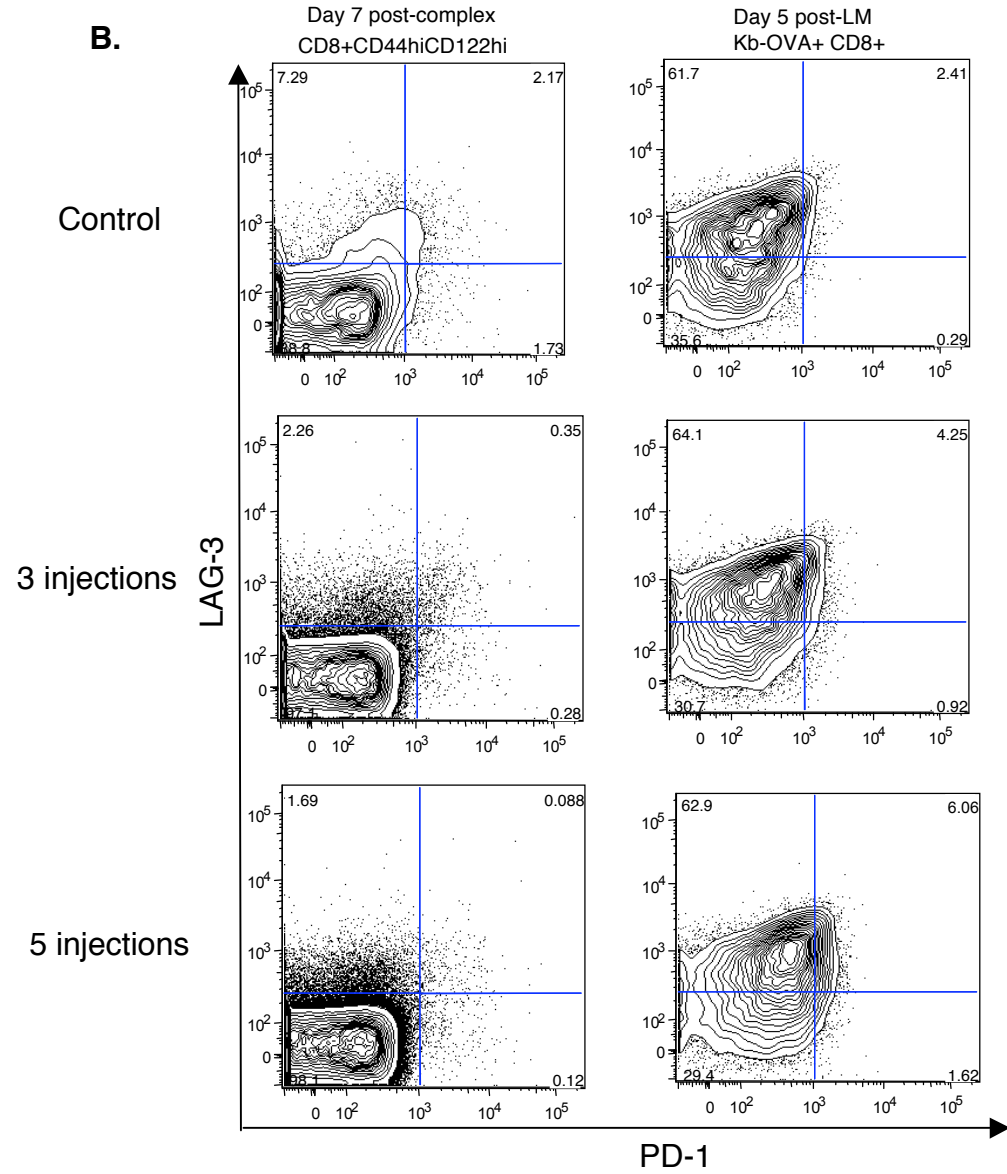

Supplemental Figure 5. Hamilton, et.al.

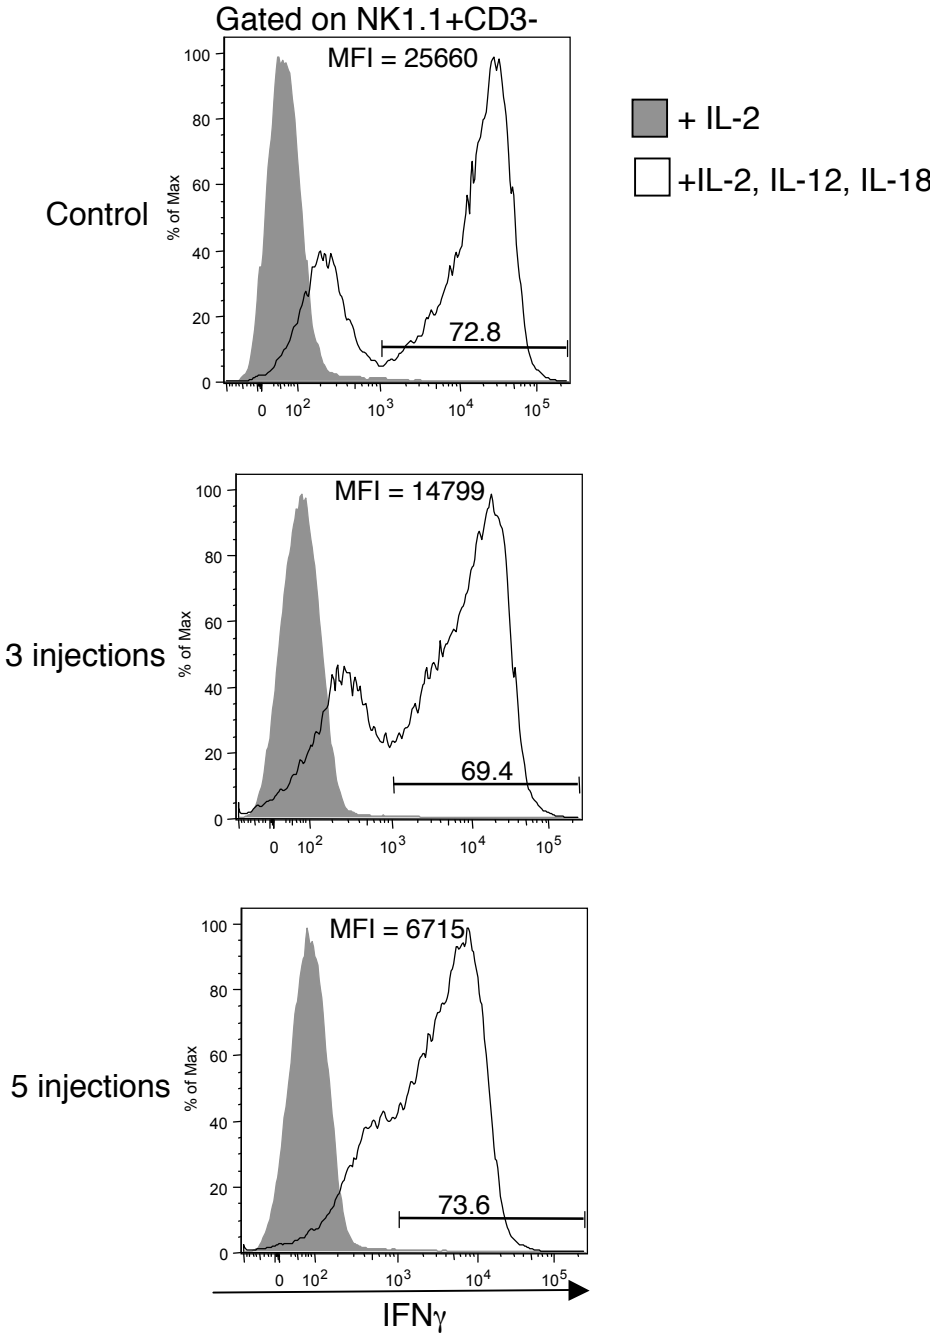

Supplement: NIHMS260434-supplement-Supplementary_Figs_.pdf [file NIHMS260434-supplement-Supplementary_Figs_.pdf]
